# Supplementary material
Source: HighWire-hosted journal article supplement (http://www.qdcxjkg.com/highwire/filestream/113606/field_highwire_adjunct_files/12/patient_information_flip_chart_-_12_languages.pdf)
Supplement: patient_information_flip_chart_-_12_languages.pdf [file patient_information_flip_chart_-_12_languages.pdf]

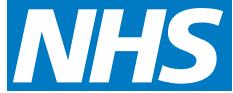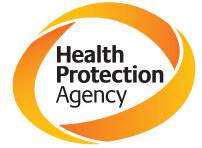

We routinely offer HIV testing to  
all patients in this clinic

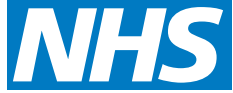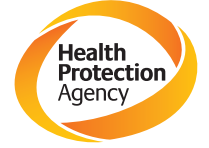

আমরা এই ক্লিনিক (চিকিৎসালয়)-এর সব রোগীদের এইচ  
আই ভি পরীক্ষার জন্য নিয়মিত সুযোগ দিই



ما در این درمانگاه آزمایش اچ.آی.وی (ویروس ایدز)  
را بطور عادی به کلیه بیماران ارائه می‌دهیم.

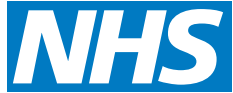

Le test de dépistage du VIH est proposé systématiquement  
à tous les patients de cette clinique.

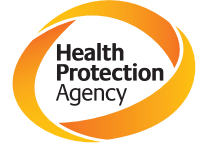

અમે આ ક્લિનિકમાં નિયમિતપણે બધા દરદીઓની એચઆઈવીની  
પરીક્ષા કરવાની તૈયારી દર્શાવીએ છીએ.

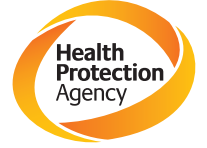

हम इस क्लिनिक में सभी रोगियों को नियमित रूप से एचआईवी जांच की पेशकश करते हैं

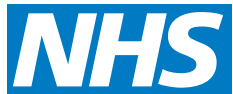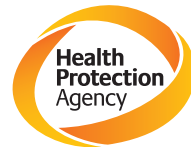

Rutynowo oferujemy badania na obecność wirusa  
HIV wszystkim pacjentom tej przychodni

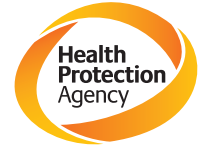

ਅਸੀਂ ਇਸ ਕਲੀਨਿਕ ਵਿਚ ਸਾਰੇ ਮਰੀਜ਼ਾਂ ਨੂੰ ਨਿਯਮਿਤ ਤੌਰ 'ਤੇ  
ਐਚਆਈਵੀ (HIV) ਦੀ ਜਾਂਚ ਦੀ ਪੇਸ਼ਕਸ਼ ਕਰਦੇ ਹਾਂ



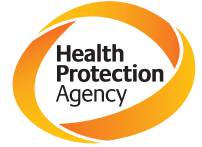

Xaruntan caafimaad si caadi ah ayaanu dhamaan  
bukaan-socodka ugu deeqnaa baaritaanka HIV-ga.



இந்த க்ளீனிக்கில் அனைத்து நோயாளிகளுக்கும் ஹெச்ஐவி  
பரிசோதனையை வழக்கமான முறையில் செய்கிறோம்



Bu klinikte tüm hastalara rutin olarak HIV testi sunmaktayız.



ہم اس کلینک میں حسب معمول تمام مریضوں کو  
ایچ آئی وی ٹیسٹنگ کی پیشکش کرتے ہیں۔
